# Supplementary material
Source: PubMed Central journal article supplement (PMC6685423)
Supplement: NIHMS1033951-supplement-suppl_2.pdf [file NIHMS1033951-supplement-suppl_2.pdf]

## Supplemental Material

### Supplemental Figure I

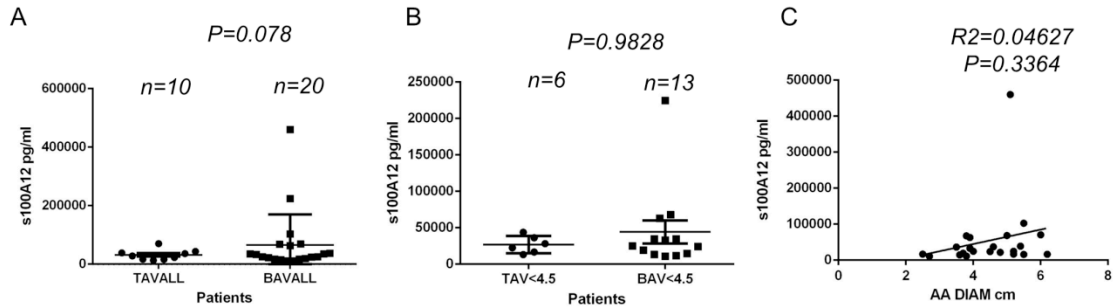

***Circulating levels of s100A12 are not significantly different in BAV patients when compared to TAV.*** (A) sRAGE quantification of TAV (n=10) and BAV (n=20) patients. Dots represent values (pg/mL) from each patient  $\pm$ SEM. (B) sRAGE values in TAV (n=6) and BAV (n=13) patients meeting the criteria for surgical intervention (ascending aorta diameter <4.5 cm). (C) Linear regression to test the correlation between s100A12 plasma concentration and ascending aorta diameter.

## Supplemental Figure II

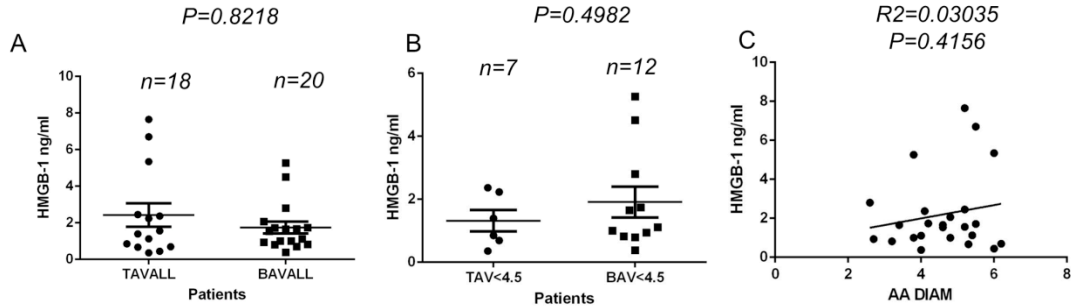

***HMGB-1 plasma concentration is not significantly different in BAV patients when compared to TAV.*** (A) sRAGE quantification of TAV (n=18) and BAV (n=20) patients. Dots represent values (pg/mL) from each patient  $\pm$ SEM. (B) sRAGE values in TAV (n=7) and BAV (n=12) patients meeting the criteria for surgical intervention (ascending aorta diameter <4.5 cm). (C) Linear regression to test the correlation between HMGB-1 plasma concentration and ascending aorta diameter.

### Supplemental Figure III

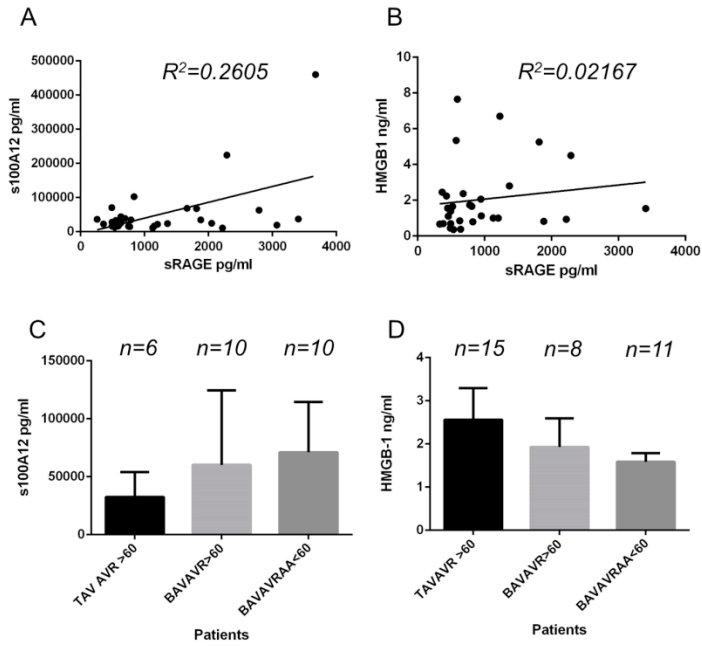

***Absence of linear correlation between s100A12 and/or HMGB-1 and sRAGE level and distribution of sRAGE ligands in slow and fast progressors.*** (A-B) Linear regression to test the correlation between s100A12 or HMGB-1 plasma concentration and sRAGE circulating levels. (C) S100A12 and HMGB-1 distribution in patients defined as fast and slow progressor by sRAGE analysis.

## Supplemental Figure IV

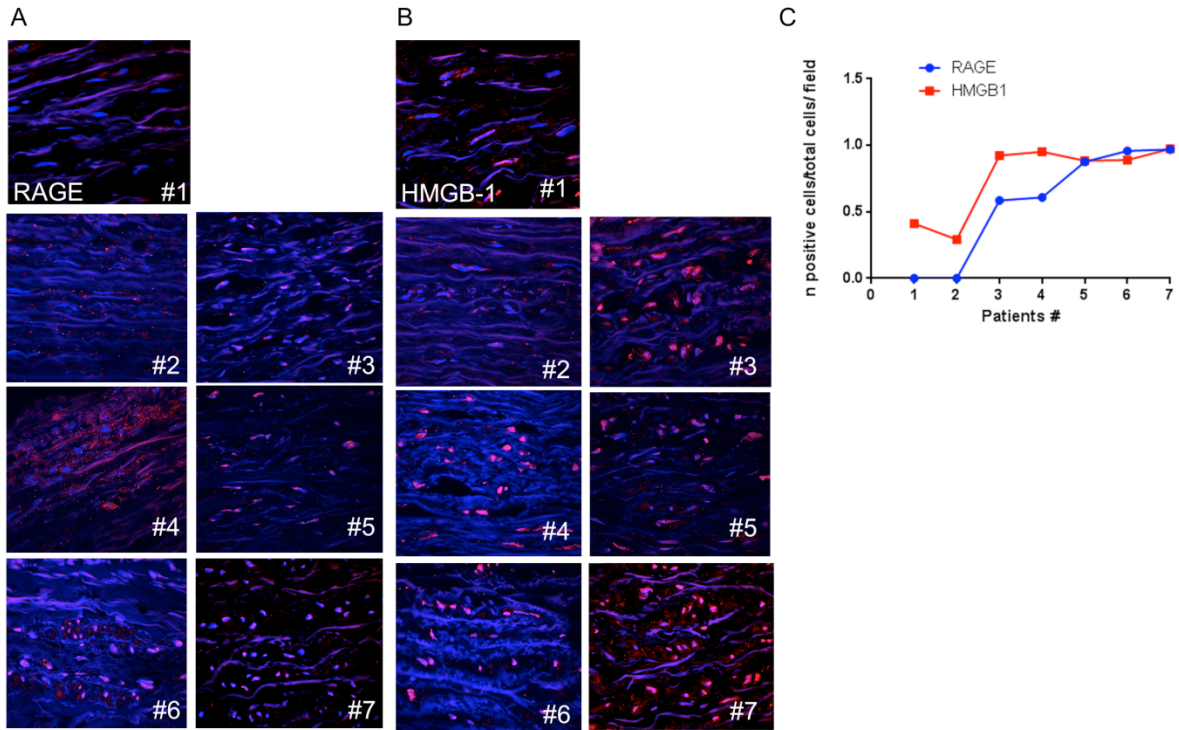

***RAGE and HMGB-1 distribution in the ascending aorta of patients with low and high levels of circulating sRAGE.*** (A-B) Immunofluorescence analysis performed on ascending aorta sections obtained from patients #1-7. Red dots represents positive staining for either RAGE or HMGB-1. Confocal Images. Magnification 100X. (C) Graph representing RAGE and HMGB-1 positive staining quantification. Positive cells were counted in 4 field/section. Number of positive cells were averaged and plotted.

### Supplemental Figure V

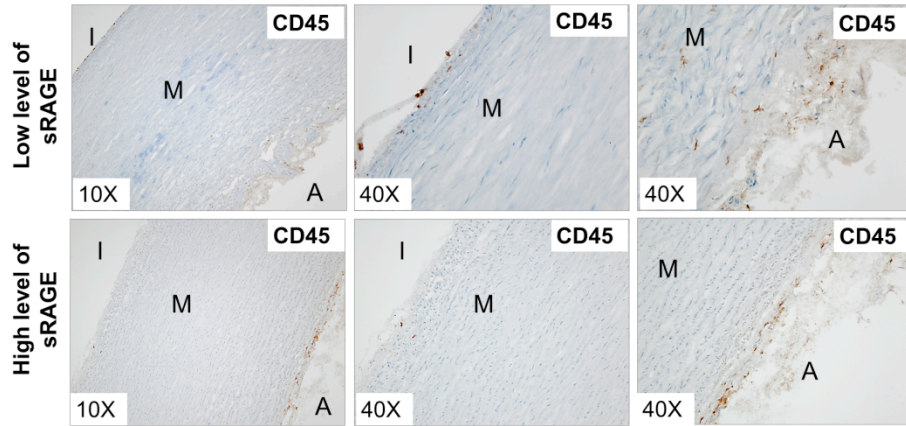

***Few inflammatory infiltrates are detected in the aorta of patients with low and high levels of sRAGE.***

Representative images of immunohistochemistry analysis for CD45 performed on ascending aorta sections obtained from patients with low and high levels of sRAGE. Magnification 10X and 40X.

I=Intima; M=Media;A=Adventitia.
